1 Prime-boost vaccination regimens with INO-4800 and INO-4802 augment and broaden immune  
2 responses against SARS-CoV-2 in nonhuman primates

3  
4 Jewell N. Walters<sup>†1</sup>, Blake Schouest<sup>†1</sup>, Ami Patel<sup>†2</sup>, Emma L. Reuschel<sup>†2</sup>, Katherine Schultheis<sup>1</sup>,  
5 Elizabeth Parzych<sup>2</sup>, Igor Maricic<sup>1</sup>, Ebony N. Gary<sup>2</sup>, Mansi Purwar<sup>2</sup>, Viviane M. Andrade<sup>1</sup>, Arthur  
6 Doan<sup>1</sup>, Dustin Elwood<sup>1</sup>, Zeena Eblimit<sup>1</sup>, Brian Nguyen<sup>1</sup>, Drew Frase<sup>2</sup>, Faraz I. Zaidi<sup>2</sup>, Abhijeet  
7 Kulkarni<sup>2</sup>, Alison Generotti<sup>1</sup>, J Joseph Kim<sup>1</sup>, Laurent M. Humeau<sup>1</sup>, Stephanie J. Ramos<sup>1</sup>, Trevor  
8 R.F. Smith<sup>1</sup>, David B. Weiner<sup>2\*</sup> and Kate E. Broderick<sup>1\*</sup>

9  
10 <sup>1</sup>Inovio Pharmaceuticals, Plymouth Meeting, PA, 19462, USA

11 <sup>2</sup>Vaccine and Immunotherapy Center, The Wistar Institute, Philadelphia, PA, 19104, USA

12 \* Corresponding authors

13 † Authors contributed equally

14

15

16 **SUMMARY**

17

18 The enhanced transmissibility and immune evasion associated with emerging SARS-CoV-2  
19 variants demands the development of next-generation vaccines capable of inducing superior  
20 protection amid a shifting pandemic landscape. Since a portion of the global population harbors  
21 some level of immunity from vaccines based on the original Wuhan-Hu-1 SARS-CoV-2 sequence  
22 or natural infection, an important question going forward is whether this immunity can be boosted  
23 by next-generation vaccines that target emerging variants while simultaneously maintaining long-  
24 term protection against existing strains. Here, we evaluated the immunogenicity of INO-4800, our  
25 synthetic DNA vaccine candidate for COVID-19 currently in clinical evaluation, and INO-4802,  
26 a next-generation DNA vaccine designed to broadly target emerging SARS-CoV-2 variants, as  
27 booster vaccines in nonhuman primates. Rhesus macaques primed over one year prior with the  
28 first-generation INO-4800 vaccine were boosted with either INO-4800 or INO-4802 in  
29 homologous or heterologous prime-boost regimens. Both boosting schedules led to an expansion  
30 of antibody responses which were characterized by improved neutralizing and ACE2 blocking  
31 activity across wild-type SARS-CoV-2 as well as multiple variants of concern. These data  
32 illustrate the durability of immunity following vaccination with INO-4800 and additionally support  
33 the use of either INO-4800 or INO-4802 in prime-boost regimens.

34

## 35 INTRODUCTION

36

37 SARS-CoV-2 is a beta-coronavirus belonging to the same family as severe acute  
38 respiratory coronavirus (SARS-CoV) and Middle East Respiratory Syndrome coronavirus  
39 (MERS-CoV), which share similar structural features including the spike glycoprotein which has  
40 been the primary target of vaccine development for each of these viruses [1]. Although the rollout  
41 of the EUA vaccines has been underway for several months, global distribution of these vaccines  
42 has fallen along entrenched socioeconomic lines, leaving many low- and middle-income countries  
43 with inadequate supply [2]. For successful global coverage, many more vaccines will be needed.  
44 The rapid expansion of SARS-CoV-2 variants of concern (VOC) has corresponded with a  
45 reduction in neutralizing antibody activity in convalescent and vaccinated individuals, suggesting  
46 that emerging mutations observed in some lineages are associated with immune escape [3-7].  
47 Alarmingly, the Beta (B.1.351) variant has demonstrated a reduced sensitivity to neutralizing sera  
48 from convalescent and immunized individuals [7]. Recently, it has been observed that vaccine  
49 effectiveness (either BNT162b2 or ChAdOx1 nCoV-19) was notably lower against the now  
50 dominant Delta (B.1.617.2) variant, compared to the Alpha (B.1.1.7) variant [8]. The combination  
51 of viral escape mechanisms and waning immunity suggest that heterologous prime-boost strategies  
52 may be needed to provide sufficient coverage against novel variants [9].

53 Synthetic DNA vaccines offer multiple advantages over other vaccine platforms including  
54 shortened clinical development timetables for vaccines against emerging infectious diseases,  
55 ability to scale up manufacture, and long-term temperature stability that facilitates rapid and  
56 efficient deployment in resource-limited settings [10-12]. We have previously described the design  
57 of a synthetic DNA vaccine encoding the wild-type (Wuhan-Hu-1) Spike protein, INO-4800,

58 which is currently in clinical evaluation [10]. In preclinical studies we have shown INO-4800  
59 vaccination induces antigen-specific T cell responses and functional antibodies that neutralize  
60 SARS-CoV-2 [10, 13, 14]. In a non-human primate (NHP) challenge model, INO-4800  
61 vaccination was associated with reduced viral loads and protection against respiratory tract disease  
62 [13, 14]. Phase 1 and 2 clinical trials of INO-4800 demonstrated a favorable safety and tolerability  
63 profile and immunogenicity [15, 16].

64 In response to the increasing number of SARS-CoV-2 VOCs demonstrating evasion of  
65 vaccine- or infection-induced humoral immunity, we have designed INO-4802, a next-generation  
66 DNA vaccine expressing a pan-Spike immunogen which has been shown to raise immunity across  
67 SARS-CoV-2 VOCs in mice [17] and confers broad protection in hamsters following intranasal  
68 challenge with multiple VOCs [17].

69 Prime-boost regimens are widely used in the development of vaccines against a variety of  
70 infectious diseases [18, 19], including DNA and viral-vector based approaches [20, 21]. DNA  
71 vaccines have particular advantages in the prime-boost setting where they have been shown to  
72 enhance both humoral and cellular responses without inducing anti-vector immunity [22]. In the  
73 boost setting DNA vaccines were found to be superior to the adenovirus platform in expanding  
74 responses to simian immunodeficiency virus (SIV) antigens in rhesus macaques [23]. In the clinic,  
75 the DNA platform is not limited by the same dose-dependent reactogenicity observed following  
76 administration of lipid nanoparticles carrying mRNA vaccines [24], which may be an important  
77 consideration in booster acceptance.

78  
79 In the current study, we investigated the durability and memory recall of antigen-specific SARS-  
80 CoV-2 responses in a cohort of non-human primates that were initially primed with the first-

81 generation SARS-CoV-2 vaccine INO-4800. One year following the primary immunization series  
82 with INO-4800, the animals were boosted with either INO-4800 or INO-4802 in homologous or  
83 heterologous prime-boost regimens, respectively. Boosting with either INO-4800 or INO-4802 led  
84 to the induction of potent neutralizing antibody responses across multiple SARS-CoV-2 VOCs  
85 that correlated with ACE2 blocking activity. These data highlight the capability of DNA vaccines  
86 to boost SARS-CoV-2 immunity.

87

## 88 **RESULTS**

89

### 90 ***Durability of SARS-CoV-2-specific humoral response following immunization with INO-4800***

91 Initial studies investigated the durability of immune responses in non-human primates (NHPs)  
92 primed with INO-4800. NHPs were immunized at week 0 and 4 with either a 1 mg or 2 mg dose  
93 of INO-4800, and blood was collected over the course of one year (**Figure 1A**). It should be noted  
94 that, for Figure 1 and Supplemental Figure 1, the NHPs were initially treated on staggered  
95 schedules, and therefore the data from the prime immunization portion of the study will show  
96 collected data points for NHP IDs #7544, 7545, 7546, 7548, 7550 terminating at Week 35 and for  
97 others, IDs #7514, 7520, 7523, 7524, terminating at Week 52. To measure levels of binding  
98 antibodies in the sera we used an enzyme-linked immunosorbent assay (ELISA). Peak antibody  
99 titers were observed at week 6 with a geometric mean endpoint titer of 258,032, two weeks  
100 following the second immunization (**Figure 1B**). Detectable levels of binding antibodies persisted  
101 in the serum for the duration of the study, and at the final timepoint prior to boosting, the 1 mg  
102 dose group had geometric mean endpoint titers of 11143 for the S1+S2 ECD. The 2 mg dose  
103 group had geometric mean endpoint titers of 4525 for the S1+S2 ECD. Similar trends were also

104 observed in the levels of binding antibodies against the SARS-CoV-2 S1, SARS-CoV-2 S2 and  
105 RBD proteins (**Supplemental Figure 1**).

106

107 Functional antibody responses were measured in a pseudovirus neutralization assay against the  
108 SARS-CoV-2 wild-type, Alpha (B.1.1.7), Beta (B.1.351) and Gamma (P.1) variants of concern  
109 (VOCs) which were in circulation during this time period. Immunization with INO-4800 resulted  
110 in the induction of neutralizing antibodies that were increased over baseline for all VOCs (**Figure**  
111 **1C-F**). SARS-CoV-2 VOC neutralizing antibody responses were durable and remained elevated  
112 over baseline at the last collected timepoint, with the 1 mg dose group having a geometric mean  
113 titer (GMT) of 301 for the wild-type variant, 349 for B.1.1.7, 158 for B.1.351, and 317 for P.1. In  
114 Figure 1E, the authors note that NHP #7545 showed reduced neutralizing activity at Week 14  
115 which was attributed to sampling error during plating. The 2 mg dose group had a GMT of 174.6  
116 for the wild-type variant, 58.2 for B.1.1.7, 100.3 for B.1.351, and 164.2 for P.1. Together, these  
117 data illustrate that the primary INO-4800 vaccination schedule induced SARS-CoV-2 specific  
118 antibodies harboring neutralizing activity that were maintained over the period of 35 – 52 weeks.

119

#### 120 *Humoral responses following delivery of either INO-4800 or INO-4802*

121 We evaluated INO-4800 and INO-4802 as booster vaccines. The same rhesus macaques that were  
122 initially primed with INO-4800 were randomized into two groups and boosted with either INO-  
123 4800, homologous to the original vaccine, or INO-4802, an updated pan-SARS-CoV-2 Spike  
124 immunogen in a heterologous boost regimen. Rhesus macaques #7544, 7545, 7546, 7548, 7550  
125 were boosted 43 weeks after the initial vaccination while NHPs #7514, 7520, 7523, 7524, were  
126 boosted at 64 weeks after the initial vaccination (**Figure 2A**).

127  
128 The homologous boost with INO-4800 resulted in the induction of antibody titers at two weeks  
129 post-boost that were increased over pre-boost levels (**Figure 2B**). Increases in binding antibody  
130 levels showed similar patterns against the wild-type, B.1.351, P.1 and Delta (B.1.617.2) Spike  
131 proteins, with GMTs of 87, 43, 43 and 342, respectively, pre-boost and 3077, 2338, 2077 and  
132 21044, respectively, post-boost. Likewise, heterologous boost with INO-4802 also led to increased  
133 binding antibodies against all variants tested with GMTs of 150, 187, 290 and 44, respectively pre-  
134 boost and 6285, 6285, 6285 and 6285, respectively, two weeks post-boost for the wild-type,  
135 B.1.351, P.1 and B.1.617.2 variants (**Figure 2B**).

136  
137 Neutralizing activity against the wild-type, B.1.351, P.1 and B.1.617.2 variants was assessed by a  
138 pseudovirus neutralization assay, which revealed increased neutralizing antibody responses  
139 against all SARS-CoV-2 variants in animals boosted with either INO-4800 or INO-4802 (**Figure**  
140 **2C**). The GMTs at Week 2 for the NHPs after the homologous INO-4800 boost were 2286.2,  
141 1199.3, 1596.1 and 785.6 against the wild-type, B.1.351, P.1 and B.1.617.2 pseudoviruses,  
142 respectively. The GMTs at Week 2 for the NHPs after the heterologous INO-4802 boost were  
143 3712, 1452.1, 4389.6 and 1434.8 against the wild-type, B.1.351, P.1 and B.1.617.2 respectively.  
144 As an additional readout of functional antibody responses, we measured ACE2/SARS-CoV-2  
145 spike interaction blocking activity of serum antibodies using a Meso Scale Discovery (MSD)  
146 assay, by quantifying the level of inhibition of ACE2 binding to a panel of variant SARS-CoV-2  
147 Spike proteins. In line with the pseudovirus neutralization data, all animals showed an increase in  
148 the level of functional anti-SARS-CoV-2 antibodies in their serum following the boost  
149 immunization (**Figure 2D**). We observed positive correlations between pseudovirus neutralization

150 and inhibition of the ACE2/SARS-CoV-2 spike interaction (**Supplemental Figure 2A**),  
151 supporting the overall functional antibody responses observed in animals receiving either booster  
152 vaccine.

153  
154 We next evaluated T follicular helper cells (T<sub>fh</sub>) cells, an important cell type in the generation of  
155 high-affinity antibodies [25-27]. The frequency of circulating T<sub>fh</sub> cells positively correlated with  
156 ACE2 blocking activity at week 2 in animals boosted with INO-4800 and INO-4802  
157 (**Supplemental Figure 2B**), supporting the generation of functional antibody responses following  
158 a boost with SARS-CoV-2 DNA vaccines. Together, these data show an augmentation of humoral  
159 responses following a boost with either INO-4800 or INO-4802 in the context of existing SARS-  
160 CoV-2 immunity, possibly increasing the breadth of immune response against multiple VOCs.

161

## 162 **DISCUSSION**

163 Emerging SARS-CoV-2 VOCs and waning immunity will likely lead to recurrent waves of  
164 COVID-19 disease [28]. The frequency and severity of future outbreaks will depend on several  
165 complex factors that will likely unfold differently across the world [29]. The duration of immunity  
166 following SARS-CoV-2 infection and vaccination will be a key determinant of future SARS-CoV-  
167 2 transmission dynamics [29]. Accumulating evidence suggests that durable immune responses  
168 are maintained in COVID-19 convalescent individuals and vaccinees [30-33]. However, the  
169 emergence of SARS-CoV-2 variants capable of evading humoral immune responses [5, 34]  
170 highlights the potential need to update vaccines to mitigate the severity of future SARS-CoV-2  
171 outbreaks. More broadly protective vaccines that can be administered as boosters may be critical  
172 in maintaining levels of protection against new outbreak waves with antigenically divergent



173 SARS-CoV-2 lineages. Recent studies have shown that the mutations associated with emerging  
174 VOCs have a negative impact on neutralizing antibody responses and on the efficacy of SARS-  
175 CoV-2 vaccines[3-7, 35]. Data show that the adenovirus-vectored ChAdOx1 nCoV-19 vaccine  
176 and nanoparticle-based NVX-CoV2373 vaccine have lower efficacy against the B.1.351 variant  
177 compared to the overall vaccine efficacy [36, 37].

178

179 The development of next-generation vaccines is one approach to broadening immune coverage  
180 against emerging SARS-CoV-2 variants, and the immunogenicity of booster vaccines that are  
181 heterologous from previous vaccinations is will play an important role in informing global  
182 immunization strategies. It was found that individuals who received a primary immunization series  
183 of mRNA-1273 and subsequently received a booster shot of Moderna's updated mRNA vaccine  
184 encoding the B.1.351 Spike protein, mRNA-1273.351, showed increases in antibody neutralization  
185 titers against the B.1.351 and P.1 variants that were superior to those in individuals who received  
186 a booster shot of mRNA-1273 [38]. Other studies have assessed the safety and immunogenicity of  
187 heterologous prime-boost regimens involving different vaccine platforms. A recent study  
188 involving individuals who originally received one of the three EUA vaccines (mRNA-1273,  
189 Ad26.COV2.S, or BNT162b2) and were subsequently boosted with a homologous or heterologous  
190 vaccine suggests that both boosting schedules increase protective efficacy against symptomatic  
191 SARS-CoV-2 infection [39]. In a separate study, favorable increases in humoral responses were  
192 observed in individuals previously vaccinated with the ChAdOx1 nCoV-19 vaccine and  
193 subsequently boosted with BNT162b2 [40, 41]. Likewise, a heterologous boost of mRNA-1273  
194 also resulted in an increase in humoral responses in individuals primed with ChAdOx1 nCoV-19  
195 [42]. However, homologous boosting strategies have also shown promise in enhancing humoral

196 responses against SARS-CoV-2 VOCs. A third dose of BNT162b2, for instance, was reported to  
197 increase neutralizing activity against the Delta variant over 5-fold in 18-55-year-olds and over 11-  
198 fold in 65-85-year-olds (Pfizer Second Quarter 2021 Earnings Report). We have observed in Phase  
199 1 trial participants that a third dose of INO-4800, our DNA vaccine candidate for COVID-19,  
200 results in higher levels of cellular and humoral immune responses without increased levels of  
201 adverse events [43].

202

203 We recently described the design, immunogenicity, and efficacy of INO-4802, a synthetic DNA  
204 vaccine expressing a pan-Spike immunogen aimed at inducing broad immunity across SARS-  
205 CoV-2 VOCs [17]. In a hamster challenge model, INO-4802 conferred protection following  
206 intranasal challenge with either the Wuhan-Hu-1, B.1.1.7, B.1.351, P.1, or B.1.617.2 (Delta)  
207 SARS-CoV-2 variants. Additionally, INO-4802 showed promise as a heterologous booster vaccine  
208 by enhancing humoral responses against VOCs in hamsters previously immunized with INO-4800.  
209 Here, we addressed the immunogenicity of INO-4800 and INO-4802 as booster regimens in rhesus  
210 macaques previously immunized with INO-4800 using clinically relevant dosing parameters.

211 Rhesus macaques receiving booster immunizations of either INO-4800 or INO-4802 showed a  
212 robust induction of humoral responses, supporting the use of either vaccine in a prime/boost  
213 regimen. Importantly, boosting of INO-4800-primed animals with INO-4800 or INO-4802  
214 resulted in neutralizing antibody responses that were magnitudes greater compared to pre-boost  
215 levels. Both treatment groups induced humoral responses capable of neutralizing wild-type and  
216 several VOC pseudoviruses, suggesting broad protection among SARS-CoV-2 variants.  
217 Pseudovirus neutralizing activity against the Beta and Gamma variants trended higher in animals  
218 boosted with the heterologous INO-4802 vaccine compared to those receiving INO-4800,

219 indicating potential for an enhanced level of protection against some emerging SARS-CoV-2  
220 variants following boosting with the next-generation pan-SARS-CoV-2 vaccine.

221

222 Neutralizing antibody responses correlated with inhibition of ACE2 binding activity, further  
223 supporting the functional antibody responses following either a homologous or heterologous boost  
224 with synthetic DNA vaccine constructs. Levels of antibodies binding variant Spike proteins were  
225 also increased following the boost immunization in both treatment groups. Together, these data  
226 point to broad functional humoral responses following a boost with both the original INO-4800  
227 and INO-4802 pan-SARS-CoV-2 DNA vaccines. The rapid boost in neutralizing antibody  
228 responses can likely be attributed to the maintenance of a memory B cell pool following the  
229 priming immunization. Similar increases in humoral responses are observed in COVID-19  
230 convalescent individuals who later received SARS-CoV-2 mRNA vaccines [44]. Longitudinal  
231 analyses have also found that SARS-CoV-2-reactive memory B cell clones are stably maintained  
232 in convalescent COVID-19 patients for several months following infection [30, 45]. Memory B  
233 cell responses persist despite the natural decline of SARS-CoV-2-specific IgG binding titers,  
234 suggestive of high-quality and durable memory B cell responses [46].

235

236 Neutralizing antibody responses are predictive of immune protection against symptomatic SARS-  
237 CoV-2 infection [47], and as such, neutralizing antibodies are an important readout in the  
238 evaluation of SARS-CoV-2 vaccines [48-50]. Owing to the critical role of T follicular helper (Tfh)  
239 cells in providing help to maturing B cells in germinal centers, Tfh responses serve as a  
240 mechanistic indicator of neutralizing antibody responses in infection and vaccination, including  
241 for EUA SARS-CoV-2 vaccines [25-27, 51-53]. We observed a positive correlation between the

242 frequency of circulating Tfh cells and functional antibody responses, further affirming the  
243 immunogenicity of SARS-CoV-2 DNA vaccine boosters in animals with existing vaccine-induced  
244 immunity.

245  
246 Overall, the development of safe and effective booster vaccines will be critical in maintaining  
247 control of SARS-CoV-2 in the long term. Ideal treatment regimens should seek to expand immune  
248 coverage to emerging variants while maintaining immune responses to existing SARS-CoV-2  
249 variants. Current focus has shifted to evaluating the cross-immunogenicity of booster vaccines  
250 against wild-type SARS-CoV-2 antigens and other VOCs and re-designing vaccines to investigate  
251 this important question. In this study, we report that the next-generation pan-SARS-CoV-2 vaccine  
252 INO-4802 boosts immune responses in animals primed with the wild-type-matched SARS-CoV-2  
253 DNA vaccine INO-4800. These data support the immunogenicity and boosting capability of INO-  
254 4800 and INO-4802 in nonhuman primates, which may have broader application in the clinical  
255 setting.

256

## 257 **Acknowledgements**

258 The studies described in this manuscript were funded by a grant from the Coalition for Epidemic  
259 Preparedness Innovations (CEPI). The authors would like to additional thank Maria Yang, Roi  
260 Ferrer, Joseph Fader, Francisco Vega Vega and Jon Schantz at Inovio Pharmaceuticals for their  
261 assistance, and John Harrison and Fabian Paz at Bioqual for their expert assistance.

262

## 263 **Author Contributions**

264 Conceptualization, J.N.W., A.P., J.J.K., S.J.R., T.R.F.S, D.B.W., K.E.B

265 Methodology, J.N.W., B.S., A.P., E.L.R., K.S., E.P., E.N.G., T.R.F.S, D.W.K

266 Investigation, J.N.W., B.S., A.P., E.L.R., K.S., E.P., I.M., M.P., V.M.A, A.D., D.E., Z.E., B.N.,

267 D.F., F.I.Z, A.K., A.G., J.J.K,

268 Writing – Original Draft, J.N.W, B.S.

269 Writing – Review & Editing, J.N.W., B.S., A.P., J.J.K., L.M.H., S.J.R., T.R.F.S., D.B.W.

270 Supervision: J.N.W, B.S., A.P., S.R., T.R.F.S., D.B.W., K.E.B

271 Project Administration: J.N.W., B.S., A.P., J.J.K., L.M.H., S.J.R., T.R.F.S., D.B.W., K.E.B.

272 Funding Acquisition: J.J.K., L.M.H., D.B.W., K.E.B.

273

## 274 **Declaration of Interests:**

275 **A.P., E.L.R., E.P., E.N.G., M.P., D.F., F.I.Z, A.K.,** declare no competing interests. **J.N.W., B.S.,**

276 **K.S., I.M., Z.E., A.D., D.E., A.G., V.M.A., J.J.K., L.M.H., S.J.R., T.R.F.S., K.E.B.** are

277 employees of Inovio Pharmaceuticals and as such receive salary and benefits, including ownership

278 of stock and stock options, from the company. **D.B.W.** discloses the following paid associations

279 with commercial partners: GeneOne (Consultant), Geneos (Advisory Board), Astrazeneca

280 (Advisory Board, Speaker), Inovio (BOD, SRA, Stock), Pfizer (Speaker), Merck (Speaker), Sanofi

281 (Advisory Board), BBI (Advisory Board).

282

## 283 **Methods**

### 284 ***Constructs***

285 The plasmid designs for INO-4800 and INO-4802 have been previously described [10, 17]. For INO-  
286 4802, a SynCon® consensus sequence for the SARS-CoV-2 spike harboring focused RBD  
287 mutations and 2P mutation was codon-optimized using Inovio's proprietary optimization  
288 algorithm. The final sequence was subcloned into the pGX0001 vector (BamHI/XhoI) and  
289 synthesized (Genscript, Piscataway, NJ).

290

### 291 *Animal Immunizations, sample collection*

292 All rhesus macaque experiments were approved by the Institutional Animal Care and Use  
293 Committee at Bioqual (Rockville, Maryland), an Association for Assessment and Accreditation of  
294 Laboratory Animal Care (AAALAC) International accredited facility. Nine Chinese rhesus  
295 macaques, five males and four females roughly 4 years of age (weights ranging from 4.48kg-  
296 8.50kg) were randomized prior to immunization and received one or two injections at 1mg per  
297 dose of INO-4800, at weeks 0 and 4 by intradermal electroporation (ID-EP) administration using  
298 the CELLECTRA 2000® Adaptive Constant Current Electroporation Device with a 3P array  
299 (Inovio Pharmaceuticals). Approximately one year post prime immunization, the study animals  
300 were randomized and received a boost immunization at 1mg per dose of INO-4800 or INO-4802  
301 by ID-EP. At the indicated time-points, blood was collected to analyse blood chemistry and to  
302 isolate peripheral blood mononuclear cells (PBMC) and serum.

303

### 304 *Peripheral blood mononuclear cell isolation and IFN- $\gamma$ Enzyme-linked immunospot (ELISpot)*

305 Blood was collected from each study animal into sodium citrate cell preparation tubes (CPT, BD  
306 Biosciences). The tubes were centrifuged to separate plasma and lymphocytes, according to the

307 manufacturer's protocol. Samples from the prime immunization were transported by same-day  
308 shipment on cold-packs from Bioqual to The Wistar Institute, and boost samples were shipped  
309 overnight to Inovio Pharmaceuticals for PBMC isolation. PBMCs were washed, and residual red  
310 blood cells were removed using ammonium-chloride-potassium (ACK) lysis buffer. Cells were  
311 counted using a ViCell counter (Beckman Coulter) and resuspended in RPMI 1640 (Corning),  
312 supplemented with 10% fetal bovine serum (Seradigm), and 1% penicillin/streptomycin (Gibco).  
313 Fresh cells were then plated for IFN $\gamma$  ELISpot assay to detect cellular responses.

314

315 Monkey IFN- $\gamma$  ELISpotPro plates (Mabtech, Sweden, Cat#3421M-2APW-10) were prepared  
316 according to the manufacturer's protocol. Freshly isolated PBMCs were added to each well at  
317 200,000 cells per well in the presence of either 1) SARS-CoV-2-specific peptide pools, 2) R10  
318 with DMSO (negative control), or 3) anti-CD3 positive control (Mabtech, 1:1000 dilution), in  
319 triplicate. Plates were incubated overnight at 37°C, 5% CO<sub>2</sub>, then after a minimum incubation of  
320 18 hours, plates were developed according to the manufacturer's protocol. Spots were imaged  
321 using a CTL Immunospot plate reader and antigen-specific responses determined by subtracting  
322 the R10-DMSO negative control wells from the wells stimulated with peptide pools.

323

#### 324 *Antigen Binding ELISA*

325 Serum collected at each time point was evaluated for binding titers as previously described [10].  
326 For prime immunization samples, ninety-six well immunosorbent plates (NUNC) were coated with  
327 1 $\mu$ g/mL recombinant SARS-CoV-2 S1+S2 ECD protein (Sino Biological 40589-V08B1), S1  
328 protein (Sino Biological 40591-V08H), S2 protein (Sino Biological 40590-V08B), or receptor-

329 binding domain (RBD) protein (Sino Biological 40595-V05H) in PBS overnight at 4°C. For boost  
330 samples, ELISA half-area plates were also coated with 1 µg/mL recombinant spike wild-type spike  
331 protein, B.1.351, P.1 and B.1.617.2 full length spike variant proteins (Acro Biosystems #SPN-  
332 C52H8, #SPN-C52Hc, #SPN-C52Hg and #SPN-C52He respectively). Secondary antibodies  
333 included IgG (Bethyl #A140-202P) at 1:50,000. Plates were washed three times with PBS + 0.05%  
334 Tween20 (PBS-T) and blocked with 3% FBS in PBS-T for 2 hours at room temperature (RT).  
335 Sera from vaccinated macaques were serially diluted in PBS-T + 1% FBS, added to the washed  
336 ELISA plates, and then incubated for 2 hours at RT. Plates were then washed and incubated with  
337 an anti-monkey IgG conjugated to horseradish peroxidase (Bethyl A140-202P) 1 hour at RT.  
338 Within 30 minutes of development, plates were read at 450nm using a Biotek Synergy2 plate  
339 reader.

340

#### 341 ***Meso Scale Discovery ACE2 Inhibition Assay***

342 Meso Scale Discovery (MSD) V-PLEX SARS-CoV-2 ACE2 Neutralization Kit, Panels 5 and 14  
343 were used to evaluate sera collected from immunized study animals according to the  
344 manufacturer's instructions with the MSD Sector S 600 instrument. Briefly, MSD plates  
345 containing SARS-CoV-2 Spike proteins (wildtype, B.1.1.7, B.1.351, P.1 and B.1.617.2) were  
346 blocked, washed, and incubated with sera from vaccinated animals at a 1:27 dilution. Plates were  
347 then washed and incubated with SULFO-TAG ACE2 and developed according to the  
348 manufacturer's protocol. Functional antibody activity was measured as percent inhibition of  
349 binding of SULFO-TAG ACE2 to Spike protein.

350



351 ***Pseudovirus Neutralization Assay***

352 SARS-CoV-2 pseudovirus stocks encoding for the WT, B.1.1.7, P.1, B.1.351 or B.1.617.2 Spike  
353 protein were produced as previously described (Smith et al Nature 2020, Andrade et al bioRxiv  
354 2021). To assess the extent of which neutralizing antibodies are present in the sera, CHO cells  
355 stably expressing ACE2 (ACE2-CHOs – Creative Biolabs) were used as target cells at 10,000  
356 cells/well. Sera was heat inactivated and serially diluted prior to incubation with the different  
357 SARS-CoV-2 variant pseudoviruses. After a 90-minute incubation, sera-pseudovirus mixture was  
358 added to ACE2-CHOs, then 72 hours later, cells were lysed using Bright-Glo™ Luciferase Assay  
359 (Promega) and RLU was measured using an automated luminometer. Neutralization titers (ID<sub>50</sub>)  
360 were calculated using GraphPad Prism 8 and defined as the reciprocal serum dilution that is  
361 reduced by 50% compared to the signal in the infected control wells.

362

363 **Flow Cytometry**

364 Thawed, cryopreserved PBMCs were assessed to determine the frequency of circulating T  
365 follicular helper (Tfh) using a panel which included the following antibodies: CD3 (BD  
366 Biosciences; clone SP34-2), CD4 (BD Biosciences; clone L200), CXCR5 (eBioscience; clone  
367 MU5UBEE), and PD-1 (BioLegend; clone EH12.2H7). Tfh cells were identified as  
368 CD3+/CD4+/CXCR5+/PD-1+. Samples were acquired on a BD Celesta flow cytometer and  
369 analysed using FlowJo software version 10.7 (Treestar Inc.).

370

371 **Figure titles and legends**

372 **Figure 1. Study design and durability of humoral immune responses in rhesus macaques**  
373 **primed with INO-4800. A)** Schematic depicting the prime immunization schedule and sample  
374 collection timepoints. Note: The longitudinal collection for the NHPs in the 1mg dose group ended  
375 at Week 35 and for 2mg dose group at Week 52. **B)** Longitudinal serum IgG binding titers in rhesus  
376 macaques vaccinated with 1 or 2 mg INO-4800 at weeks 0 and 4. Antibody titers in the sera were  
377 measured against the wildtype SARS-CoV-2 Spike protein antigen. **C-F)** Longitudinal serum  
378 pseudovirus neutralizing activity in rhesus macaques between weeks XX. Neutralizing activity  
379 ( $ID_{50}$ ) was measured against the wildtype (Wuhan) SARS-CoV-2 (C), B.1.1.7 (D), B.1.351 (E) and  
380 P.1 (F) pseudoviruses.

381

382 **Figure 2. Humoral immune responses following homologous or heterologous boost in INO-**  
383 **4800-primed rhesus macaques.** Antibody responses were measured in animals boosted with 1  
384 mg of either the homologous INO-4800 (purple symbols) or heterologous INO-4802 (blue  
385 symbols) vaccines on the day of the boost (week 0) and at weeks 2 and 4 post-boost. **A)** Schematic  
386 of the boost schedule showing the vaccine groups with the respective animal IDs. **B)** Serum IgG  
387 binding titers in rhesus macaques boosted with INO-4800 or INO-4802. Binding titers were  
388 measured against the wildtype (top left) B.1.351 (top right), P.1 (lower left), and B.1.617.2 (lower  
389 right) Spike proteins. **C)** Serum pseudovirus neutralizing activity in rhesus macaques boosted with  
390 INO-4800 or INO-4802. Neutralizing activity was measured against the wildtype (top left) B.1.351  
391 (top right), P.1 (lower left), and B.1.617.2 (lower right) pseudoviruses. **D)** ACE2 blocking activity  
392 in the serum collected from rhesus macaques boosted with INO-4800 or INO-4802. Inhibition of

393 ACE2 binding was measured against the wildtype (top left) B.1.351 (top right), P.1 (lower left),  
394 and B.1.617.2 (lower right) Spike proteins.

395

396 **Figure S1. Humoral Responses in INO-4800 vaccinated rhesus macaques.** IgG binding was  
397 measured in sera from INO-4800 vaccinated rhesus macaques to SARS-CoV-2 RBD (A), S1 (B)  
398 and S2 (C) protein antigens.

399

400 **Figure S2. Functional antibody responses following homologous or heterologous boost in**  
401 **INO-4800-primed rhesus macaques.** A) Spearman correlation of ACE2 blocking activity and  
402 neutralizing activity among animals boosted with either INO-4800 or INO-4802. Correlations  
403 relating to functional antibody responses against the wildtype (left) B.1.351 SARS-CoV-2 (center),  
404 and B.1.617.2 (right) variants at weeks 2 and 4 post-boost are shown. B) Spearman correlation of  
405 the frequency of circulating T follicular helper cells with ACE-2 binding inhibition at week 2 post-  
406 boost.

407

## 408 References

- 409 1. Tse LV, Meganck RM, Graham RL, Baric RS. The Current and Future State of Vaccines, Antivirals  
410 and Gene Therapies Against Emerging Coronaviruses. *Front Microbiol.* 2020;11:658. Epub 2020/05/12.  
411 doi: 10.3389/fmicb.2020.00658. PubMed PMID: 32390971; PubMed Central PMCID: PMC7193113.
- 412 2. Mullard A. How COVID vaccines are being divvied up around the world. *Nature.* 2020. Epub  
413 2020/12/02. doi: 10.1038/d41586-020-03370-6. PubMed PMID: 33257891.
- 414 3. Wibmer CK, Ayres F, Hermanus T, Madzivhandila M, Kgagudi P, Oosthuysen B, et al. SARS-CoV-2  
415 501Y.V2 escapes neutralization by South African COVID-19 donor plasma. *Nat Med.* 2021;27(4):622-5.  
416 Epub 2021/03/04. doi: 10.1038/s41591-021-01285-x. PubMed PMID: 33654292.
- 417 4. Wang P, Nair MS, Liu L, Iketani S, Luo Y, Guo Y, et al. Antibody resistance of SARS-CoV-2 variants  
418 B.1.351 and B.1.1.7. *Nature.* 2021;593(7857):130-5. Epub 2021/03/09. doi: 10.1038/s41586-021-03398-  
419 2. PubMed PMID: 33684923.
- 420 5. Garcia-Beltran WF, Lam EC, St Denis K, Nitido AD, Garcia ZH, Hauser BM, et al. Multiple SARS-CoV-  
421 2 variants escape neutralization by vaccine-induced humoral immunity. *Cell.* 2021;184(9):2372-83 e9.  
422 Epub 2021/03/21. doi: 10.1016/j.cell.2021.03.013. PubMed PMID: 33743213; PubMed Central PMCID:  
423 PMC7953441.
- 424 6. Wu K, Werner AP, Moliva JI, Koch M, Choi A, Stewart-Jones GBE, et al. mRNA-1273 vaccine induces  
425 neutralizing antibodies against spike mutants from global SARS-CoV-2 variants. *bioRxiv.*  
426 2021:2021.01.25.427948. doi: 10.1101/2021.01.25.427948.
- 427 7. Planas D, Bruel T, Grzelak L, Guivel-Benhassine F, Staropoli I, Porrot F, et al. Sensitivity of infectious  
428 SARS-CoV-2 B.1.1.7 and B.1.351 variants to neutralizing antibodies. *Nat Med.* 2021;27(5):917-24. Epub  
429 2021/03/28. doi: 10.1038/s41591-021-01318-5. PubMed PMID: 33772244.
- 430 8. Lopez Bernal J, Andrews N, Gower C, Gallagher E, Simmons R, Thelwall S, et al. Effectiveness of  
431 Covid-19 Vaccines against the B.1.617.2 (Delta) Variant. *N Engl J Med.* 2021;385(7):585-94. Epub  
432 2021/07/22. doi: 10.1056/NEJMoa2108891. PubMed PMID: 34289274; PubMed Central PMCID:  
433 PMC8314739.
- 434 9. Barros-Martins J, Hammerschmidt SI, Cossmann A, Odak I, Stankov MV, Morillas Ramos G, et al.  
435 Immune responses against SARS-CoV-2 variants after heterologous and homologous ChAdOx1 nCoV-  
436 19/BNT162b2 vaccination. *Nat Med.* 2021. Epub 2021/07/16. doi: 10.1038/s41591-021-01449-9. PubMed  
437 PMID: 34262158.
- 438 10. Smith TRF, Patel A, Ramos S, Elwood D, Zhu X, Yan J, et al. Immunogenicity of a DNA vaccine  
439 candidate for COVID-19. *Nat Commun.* 2020;11(1):2601. doi: 10.1038/s41467-020-16505-0. PubMed  
440 PMID: 32433465.
- 441 11. Maslow JN. Vaccine development for emerging virulent infectious diseases. *Vaccine.*  
442 2017;35(41):5437-43. Epub 2017/02/22. doi: 10.1016/j.vaccine.2017.02.015. PubMed PMID: 28216184;  
443 PubMed Central PMCID: PMC7115543.
- 444 12. Tebas P, Kraynyak KA, Patel A, Maslow JN, Morrow MP, Sylvester AJ, et al. Intradermal SynCon(R)  
445 Ebola GP DNA Vaccine Is Temperature Stable and Safely Demonstrates Cellular and Humoral  
446 Immunogenicity Advantages in Healthy Volunteers. *J Infect Dis.* 2019;220(3):400-10. Epub 2019/03/21.  
447 doi: 10.1093/infdis/jiz132. PubMed PMID: 30891607.
- 448 13. Gooch KE, Smith TRF, Salguero FJ, Fotheringham SA, Watson RJ, Dennis MJ, et al. One or two dose  
449 regimen of the SARS-CoV-2 synthetic DNA vaccine INO-4800 protects against respiratory tract disease  
450 burden in nonhuman primate challenge model. *Vaccine.* 2021;39(34):4885-94. Epub 2021/07/14. doi:  
451 10.1016/j.vaccine.2021.06.057. PubMed PMID: 34253420; PubMed Central PMCID: PMC8220992.

- 452 14. Patel A, Walters J, Reuschel EL, Schultheis K, Parzych E, Gary EN, et al. Intradermal-delivered DNA  
453 vaccine provides anamnestic protection in a rhesus macaque SARS-CoV-2 challenge model. *bioRxiv*.  
454 2020:2020.07.28.225649. doi: 10.1101/2020.07.28.225649.
- 455 15. Tebas P, Yang S, Boyer JD, Reuschel EL, Patel A, Christensen-Quick A, et al. Safety and  
456 immunogenicity of INO-4800 DNA vaccine against SARS-CoV-2: A preliminary report of an open-label,  
457 Phase 1 clinical trial. *EClinicalMedicine*. 2021;31:100689. Epub 2021/01/05. doi:  
458 10.1016/j.eclinm.2020.100689. PubMed PMID: 33392485; PubMed Central PMCID: PMCPMC7759123.
- 459 16. Mammen MP, Tebas P, Agnes J, Giffear M, Kraynyak KA, Blackwood E, et al. Safety and  
460 immunogenicity of INO-4800 DNA vaccine against SARS-CoV-2: a preliminary report of a randomized,  
461 blinded, placebo-controlled, Phase 2 clinical trial in adults at high risk of viral exposure. *medRxiv*.  
462 2021:2021.05.07.21256652. doi: 10.1101/2021.05.07.21256652.
- 463 17. Reed CC, Schultheis K, Andrade VM, Kalia R, Tur J, Schouest B, et al. Design and immunogenicity  
464 of a Pan-SARS-CoV-2 synthetic DNA vaccine. *bioRxiv*. 2021:2021.05.11.443592. doi:  
465 10.1101/2021.05.11.443592.
- 466 18. Kardani K, Bolhassani A, Shahbazi S. Prime-boost vaccine strategy against viral infections:  
467 Mechanisms and benefits. *Vaccine*. 2016;34(4):413-23. Epub 2015/12/23. doi:  
468 10.1016/j.vaccine.2015.11.062. PubMed PMID: 26691569.
- 469 19. Lu S. Heterologous prime-boost vaccination. *Curr Opin Immunol*. 2009;21(3):346-51. Epub  
470 2009/06/09. doi: 10.1016/j.coi.2009.05.016. PubMed PMID: 19500964; PubMed Central PMCID:  
471 PMCPMC3743086.
- 472 20. Bakari M, Aboud S, Nilsson C, Francis J, Buma D, Moshiro C, et al. Broad and potent immune  
473 responses to a low dose intradermal HIV-1 DNA boosted with HIV-1 recombinant MVA among healthy  
474 adults in Tanzania. *Vaccine*. 2011;29(46):8417-28. Epub 2011/08/26. doi: 10.1016/j.vaccine.2011.08.001.  
475 PubMed PMID: 21864626; PubMed Central PMCID: PMCPMC4795940.
- 476 21. Koblin BA, Casapia M, Morgan C, Qin L, Wang ZM, Defawe OD, et al. Safety and immunogenicity  
477 of an HIV adenoviral vector boost after DNA plasmid vaccine prime by route of administration: a  
478 randomized clinical trial. *PLoS One*. 2011;6(9):e24517. Epub 2011/09/21. doi:  
479 10.1371/journal.pone.0024517. PubMed PMID: 21931737; PubMed Central PMCID: PMCPMC3171485.
- 480 22. Sardesai NY, Weiner DB. Electroporation delivery of DNA vaccines: prospects for success. *Curr*  
481 *Opin Immunol*. 2011;23(3):421-9. Epub 2011/05/03. doi: 10.1016/j.coi.2011.03.008. PubMed PMID:  
482 21530212; PubMed Central PMCID: PMCPMC3109217.
- 483 23. Hirao LA, Wu L, Satishchandran A, Khan AS, Draghia-Akli R, Finnefrock AC, et al. Comparative  
484 analysis of immune responses induced by vaccination with SIV antigens by recombinant Ad5 vector or  
485 plasmid DNA in rhesus macaques. *Mol Ther*. 2010;18(8):1568-76. Epub 2010/06/17. doi:  
486 10.1038/mt.2010.112. PubMed PMID: 20551910; PubMed Central PMCID: PMCPMC2927062.
- 487 24. Sahin U, Muik A, Derhovanessian E, Vogler I, Kranz LM, Vormehr M, et al. COVID-19 vaccine  
488 BNT162b1 elicits human antibody and TH1 T cell responses. *Nature*. 2020;586(7830):594-9. Epub  
489 2020/10/01. doi: 10.1038/s41586-020-2814-7. PubMed PMID: 32998157.
- 490 25. Crotty S. T Follicular Helper Cell Biology: A Decade of Discovery and Diseases. *Immunity*.  
491 2019;50(5):1132-48. Epub 2019/05/23. doi: 10.1016/j.immuni.2019.04.011. PubMed PMID: 31117010;  
492 PubMed Central PMCID: PMCPMC6532429.
- 493 26. Pardi N, Hogan MJ, Naradikian MS, Parkhouse K, Cain DW, Jones L, et al. Nucleoside-modified  
494 mRNA vaccines induce potent T follicular helper and germinal center B cell responses. *J Exp Med*.  
495 2018;215(6):1571-88. Epub 2018/05/10. doi: 10.1084/jem.20171450. PubMed PMID: 29739835; PubMed  
496 Central PMCID: PMCPMC5987916.
- 497 27. Tauzin A, Nayrac M, Benlarbi M, Gong SY, Gasser R, Beaudoin-Bussieres G, et al. A single dose of  
498 the SARS-CoV-2 vaccine BNT162b2 elicits Fc-mediated antibody effector functions and T cell responses.

- 499 Cell Host Microbe. 2021;29(7):1137-50 e6. Epub 2021/06/17. doi: 10.1016/j.chom.2021.06.001. PubMed  
500 PMID: 34133950; PubMed Central PMCID: PMC8175625.
- 501 28. Kissler SM, Tedijanto C, Goldstein E, Grad YH, Lipsitch M. Projecting the transmission dynamics of  
502 SARS-CoV-2 through the postpandemic period. *Science*. 2020;368(6493):860-8. Epub 2020/04/16. doi:  
503 10.1126/science.abb5793. PubMed PMID: 32291278; PubMed Central PMCID: PMC7164482.
- 504 29. Scudellari M. How the pandemic might play out in 2021 and beyond. *Nature*. 2020;584(7819):22-  
505 5. Epub 2020/08/08. doi: 10.1038/d41586-020-02278-5. PubMed PMID: 32760050.
- 506 30. Dan JM, Mateus J, Kato Y, Hastie KM, Yu ED, Faliti CE, et al. Immunological memory to SARS-CoV-  
507 2 assessed for up to 8 months after infection. *Science*. 2021;371(6529). Epub 2021/01/08. doi:  
508 10.1126/science.abf4063. PubMed PMID: 33408181; PubMed Central PMCID: PMC7919858.
- 509 31. Hartley GE, Edwards ESJ, Aui PM, Varese N, Stojanovic S, McMahon J, et al. Rapid generation of  
510 durable B cell memory to SARS-CoV-2 spike and nucleocapsid proteins in COVID-19 and convalescence.  
511 *Sci Immunol*. 2020;5(54). Epub 2021/01/15. doi: 10.1126/sciimmunol.abf8891. PubMed PMID: 33443036;  
512 PubMed Central PMCID: PMC7877496.
- 513 32. Widge AT, Roupael NG, Jackson LA, Anderson EJ, Roberts PC, Makhene M, et al. Durability of  
514 Responses after SARS-CoV-2 mRNA-1273 Vaccination. *N Engl J Med*. 2021;384(1):80-2. Epub 2020/12/04.  
515 doi: 10.1056/NEJMc2032195. PubMed PMID: 33270381; PubMed Central PMCID: PMC7727324.
- 516 33. Garrido C, Curtis AD, 2nd, Dennis M, Pathak SH, Gao H, Montefiori D, et al. SARS-CoV-2 vaccines  
517 elicit durable immune responses in infant rhesus macaques. *Sci Immunol*. 2021;6(60). Epub 2021/06/17.  
518 doi: 10.1126/sciimmunol.abj3684. PubMed PMID: 34131024.
- 519 34. Geers D, Shamier MC, Bogers S, den Hartog G, Gommers L, Nieuwkoop NN, et al. SARS-CoV-2  
520 variants of concern partially escape humoral but not T-cell responses in COVID-19 convalescent donors  
521 and vaccinees. *Sci Immunol*. 2021;6(59). Epub 2021/05/27. doi: 10.1126/sciimmunol.abj1750. PubMed  
522 PMID: 34035118.
- 523 35. Andrade VM, Christensen-Quick A, Agnes J, Tur J, Reed C, Kalia R, et al. INO-4800 DNA Vaccine  
524 Induces Neutralizing Antibodies and T cell Activity Against Global SARS-CoV-2 Variants. *bioRxiv*.  
525 2021:2021.04.14.439719. doi: 10.1101/2021.04.14.439719.
- 526 36. Madhi SA, Baillie V, Cutland CL, Voysey M, Koen AL, Fairlie L, et al. Efficacy of the ChAdOx1 nCoV-  
527 19 Covid-19 Vaccine against the B.1.351 Variant. *N Engl J Med*. 2021;384(20):1885-98. Epub 2021/03/17.  
528 doi: 10.1056/NEJMoa2102214. PubMed PMID: 33725432; PubMed Central PMCID: PMC7993410.
- 529 37. Shinde V, Bhikha S, Hoosain Z, Archary M, Bhorat Q, Fairlie L, et al. Efficacy of NVX-CoV2373 Covid-  
530 19 Vaccine against the B.1.351 Variant. *N Engl J Med*. 2021;384(20):1899-909. Epub 2021/05/06. doi:  
531 10.1056/NEJMoa2103055. PubMed PMID: 33951374; PubMed Central PMCID: PMC8091623.
- 532 38. Wu K, Choi A, Koch M, Ma L, Hill A, Nunna N, et al. Preliminary Analysis of Safety and  
533 Immunogenicity of a SARS-CoV-2 Variant Vaccine Booster. *medRxiv*. 2021:2021.05.05.21256716. doi:  
534 10.1101/2021.05.05.21256716.
- 535 39. Atmar RL, Lyke KE, Deming ME, Jackson LA, Branche AR, El Sahly HM, et al. Heterologous SARS-  
536 CoV-2 Booster Vaccinations – Preliminary Report. *medRxiv*. 2021:2021.10.10.21264827. doi:  
537 10.1101/2021.10.10.21264827.
- 538 40. Liu X, Shaw RH, Stuart ASV, Greenland M, Aley PK, Andrews NJ, et al. Safety and immunogenicity  
539 of heterologous versus homologous prime-boost schedules with an adenoviral vectored and mRNA  
540 COVID-19 vaccine (Com-COV): a single-blind, randomised, non-inferiority trial. *Lancet*. 2021. Epub  
541 2021/08/10. doi: 10.1016/S0140-6736(21)01694-9. PubMed PMID: 34370971; PubMed Central PMCID:  
542 PMC8346248.
- 543 41. Tenbusch M, Schumacher S, Vogel E, Priller A, Held J, Steininger P, et al. Heterologous prime-boost  
544 vaccination with ChAdOx1 nCoV-19 and BNT162b2. *Lancet Infect Dis*. 2021. Epub 2021/08/02. doi:  
545 10.1016/S1473-3099(21)00420-5. PubMed PMID: 34332707; PubMed Central PMCID: PMC8321428.



- 546 42. Normark J, Vikstrom L, Gwon YD, Persson IL, Edin A, Bjorsell T, et al. Heterologous ChAdOx1 nCoV-  
547 19 and mRNA-1273 Vaccination. *N Engl J Med.* 2021. Epub 2021/07/15. doi: 10.1056/NEJMc2110716.  
548 PubMed PMID: 34260850; PubMed Central PMCID: PMC8314734.
- 549 43. Kraynyak KA, Blackwood E, Agnes J, Tebas P, Giffear M, Amante D, et al. SARS-CoV-2 DNA Vaccine  
550 INO-4800 Induces Durable Immune Responses Capable of Being Boosted in a Phase 1 Open-Label Trial.  
551 *medRxiv.* 2021:2021.10.06.21264584. doi: 10.1101/2021.10.06.21264584.
- 552 44. Wang Z, Muecksch F, Schaefer-Babajew D, Finkin S, Viant C, Gaebler C, et al. Naturally enhanced  
553 neutralizing breadth against SARS-CoV-2 one year after infection. *Nature.* 2021;595(7867):426-31. Epub  
554 2021/06/15. doi: 10.1038/s41586-021-03696-9. PubMed PMID: 34126625; PubMed Central PMCID:  
555 PMC8277577.
- 556 45. Sokal A, Chappert P, Barba-Spaeth G, Roeser A, Fourati S, Azzaoui I, et al. Maturation and  
557 persistence of the anti-SARS-CoV-2 memory B cell response. *Cell.* 2021;184(5):1201-13 e14. Epub  
558 2021/02/12. doi: 10.1016/j.cell.2021.01.050. PubMed PMID: 33571429; PubMed Central PMCID:  
559 PMC7994111.
- 560 46. Winklmeier S, Eisenhut K, Taskin D, Rübsamen H, Schneider C, Eichhorn P, et al. Persistence of  
561 functional memory B cells recognizing SARS-CoV-2 variants despite loss of specific IgG. *medRxiv.*  
562 2021:2021.05.15.21257210. doi: 10.1101/2021.05.15.21257210.
- 563 47. Khoury DS, Cromer D, Reynaldi A, Schlub TE, Wheatley AK, Juno JA, et al. Neutralizing antibody  
564 levels are highly predictive of immune protection from symptomatic SARS-CoV-2 infection. *Nat Med.*  
565 2021;27(7):1205-11. Epub 2021/05/19. doi: 10.1038/s41591-021-01377-8. PubMed PMID: 34002089.
- 566 48. Wu K, Werner AP, Koch M, Choi A, Narayanan E, Stewart-Jones GBE, et al. Serum Neutralizing  
567 Activity Elicited by mRNA-1273 Vaccine. *N Engl J Med.* 2021;384(15):1468-70. Epub 2021/03/18. doi:  
568 10.1056/NEJMc2102179. PubMed PMID: 33730471; PubMed Central PMCID: PMC8008744.
- 569 49. Sahin U, Muik A, Vogler I, Derhovanessian E, Kranz LM, Vormehr M, et al. BNT162b2 vaccine  
570 induces neutralizing antibodies and poly-specific T cells in humans. *Nature.* 2021;595(7868):572-7. Epub  
571 2021/05/28. doi: 10.1038/s41586-021-03653-6. PubMed PMID: 34044428.
- 572 50. Folegatti PM, Ewer KJ, Aley PK, Angus B, Becker S, Belij-Rammerstorfer S, et al. Safety and  
573 immunogenicity of the ChAdOx1 nCoV-19 vaccine against SARS-CoV-2: a preliminary report of a phase  
574 1/2, single-blind, randomised controlled trial. *Lancet.* 2020;396(10249):467-78. Epub 2020/07/24. doi:  
575 10.1016/S0140-6736(20)31604-4. PubMed PMID: 32702298; PubMed Central PMCID: PMC7445431.
- 576 51. Zhang J, Wu Q, Liu Z, Wang Q, Wu J, Hu Y, et al. Spike-specific circulating T follicular helper cell  
577 and cross-neutralizing antibody responses in COVID-19-convalescent individuals. *Nat Microbiol.*  
578 2021;6(1):51-8. Epub 2020/11/18. doi: 10.1038/s41564-020-00824-5. PubMed PMID: 33199863.
- 579 52. Juno JA, Tan HX, Lee WS, Reynaldi A, Kelly HG, Wragg K, et al. Humoral and circulating follicular  
580 helper T cell responses in recovered patients with COVID-19. *Nat Med.* 2020;26(9):1428-34. Epub  
581 2020/07/15. doi: 10.1038/s41591-020-0995-0. PubMed PMID: 32661393.
- 582 53. Corbett KS, Flynn B, Foulds KE, Francica JR, Boyoglu-Barnum S, Werner AP, et al. Evaluation of the  
583 mRNA-1273 Vaccine against SARS-CoV-2 in Nonhuman Primates. *N Engl J Med.* 2020;383(16):1544-55.  
584 Epub 2020/07/30. doi: 10.1056/NEJMoa2024671. PubMed PMID: 32722908; PubMed Central PMCID:  
585 PMC7449230.
- 586

Figure 1

Prime

A

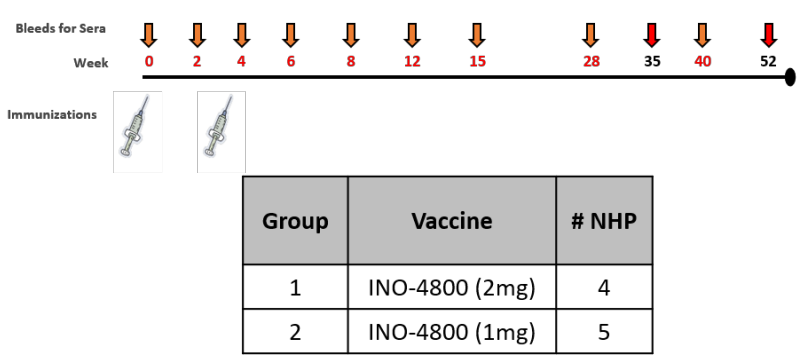

B

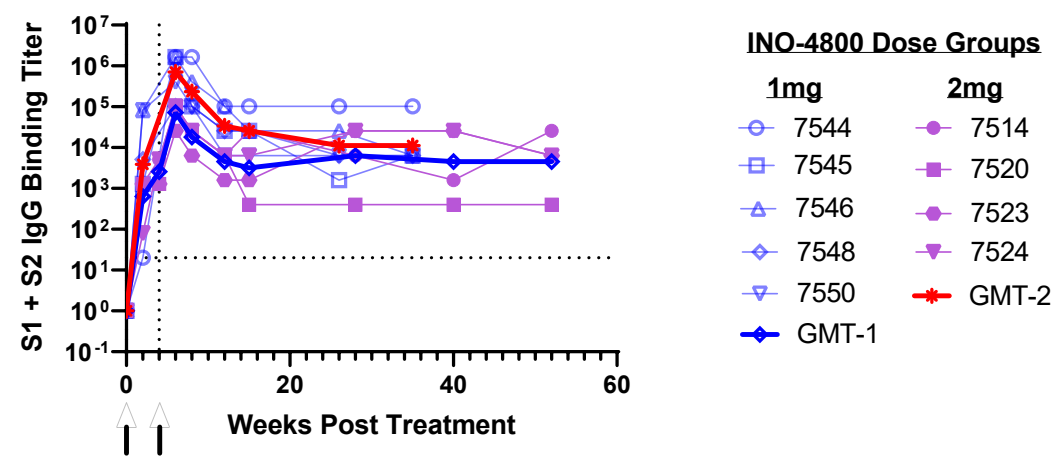

C

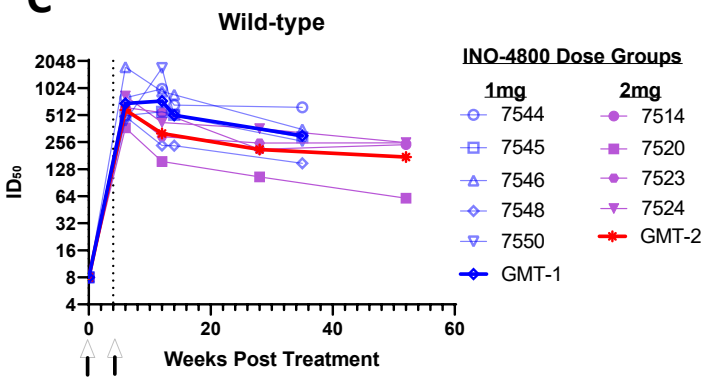

D

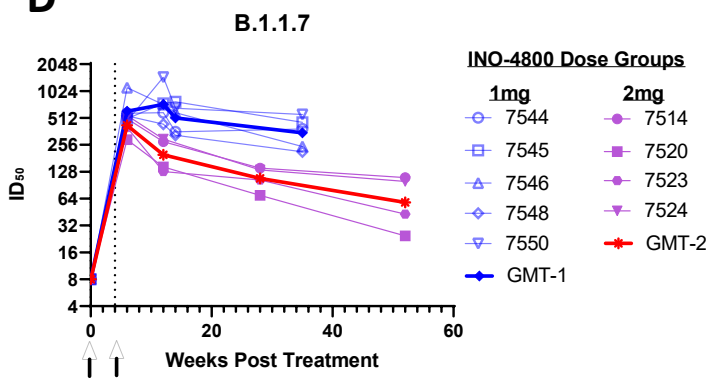

E

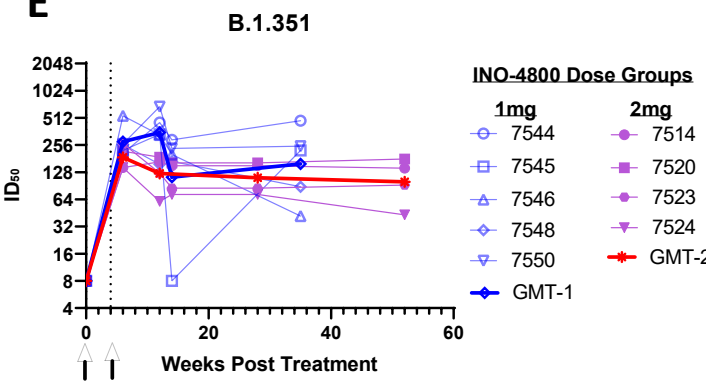

F

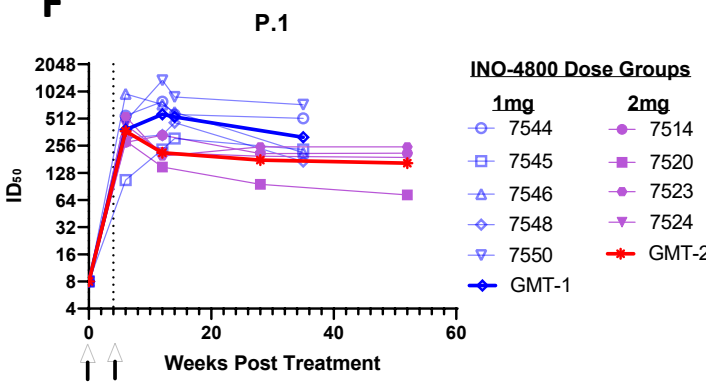



Figure 2

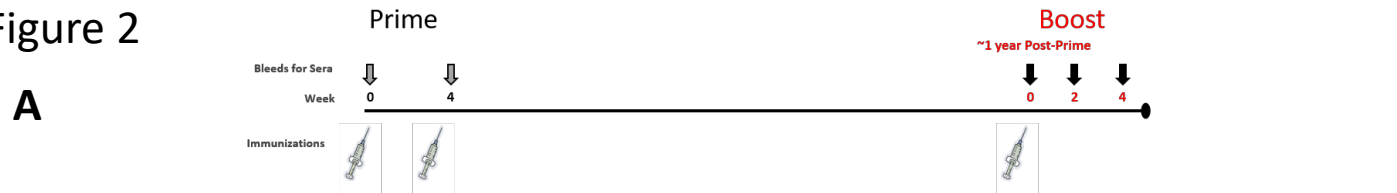

| Randomized Animals from Prime |                |       |                              |
|-------------------------------|----------------|-------|------------------------------|
| Group                         | Vaccine        | # NHP | Animal IDs                   |
| 1                             | INO-4800 (1mg) | 4     | 7523, 7545, 7546, 7550       |
| 2                             | INO-4802 (1mg) | 5     | 7514, 7520, 7524, 7544, 7548 |

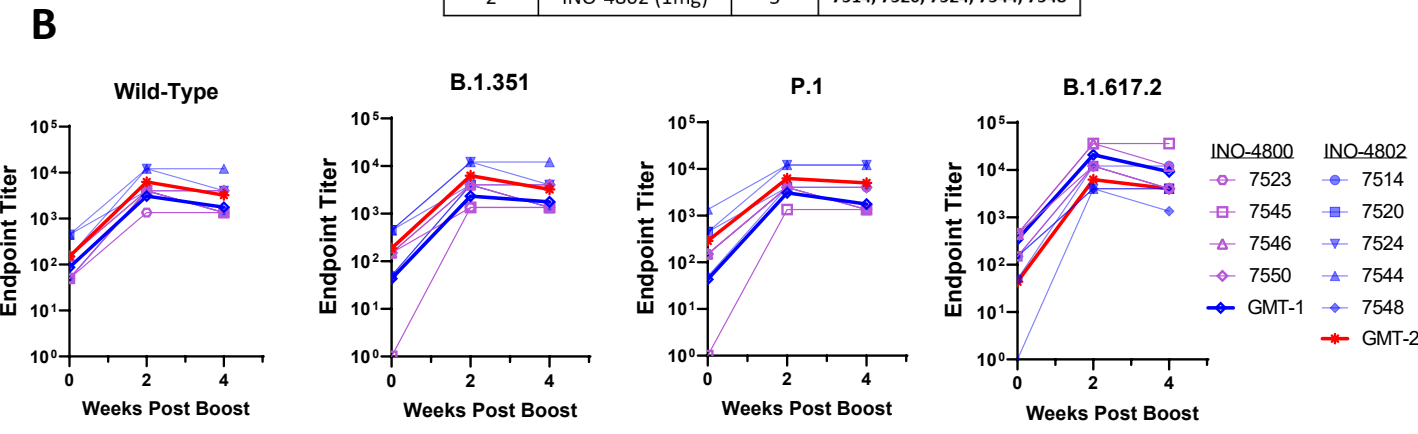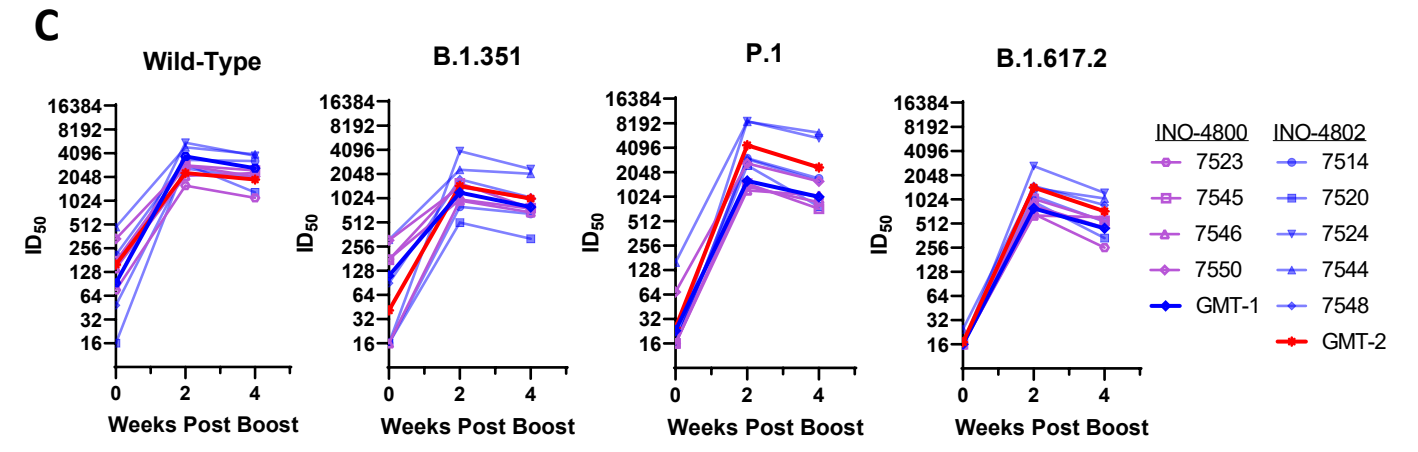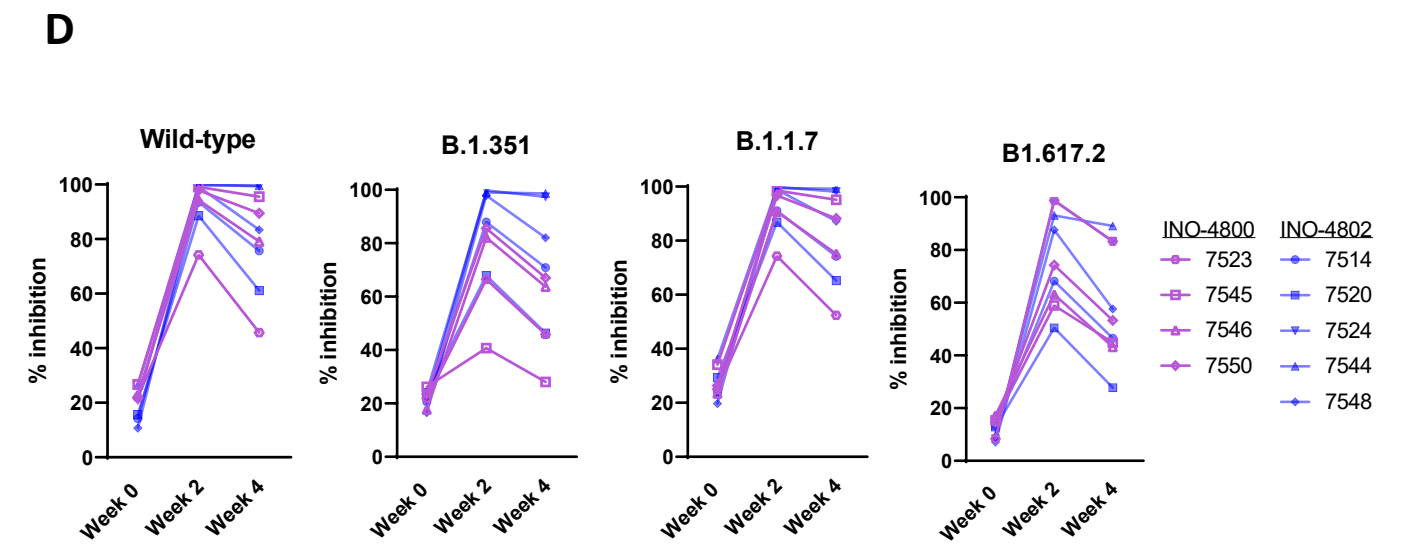

# Supplemental Figure 1

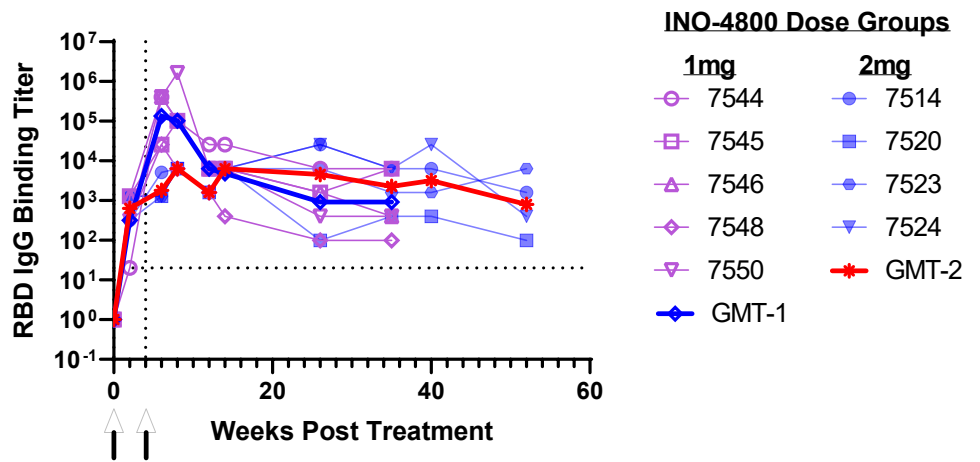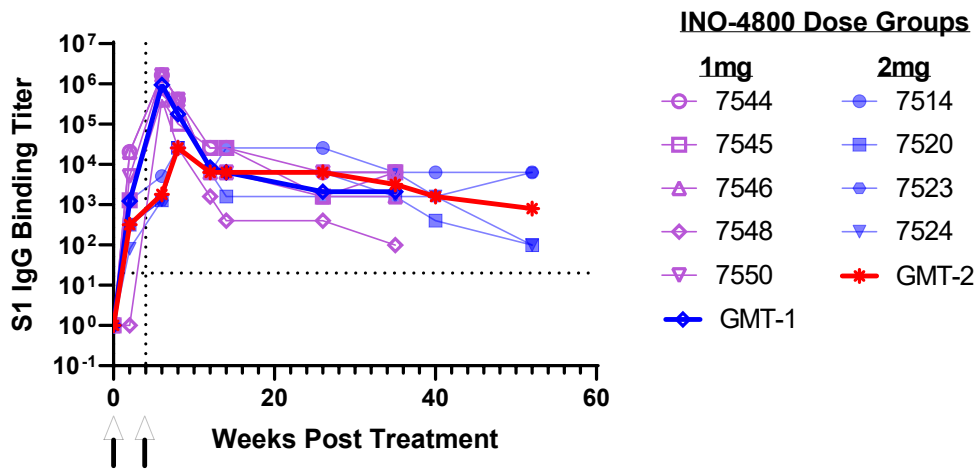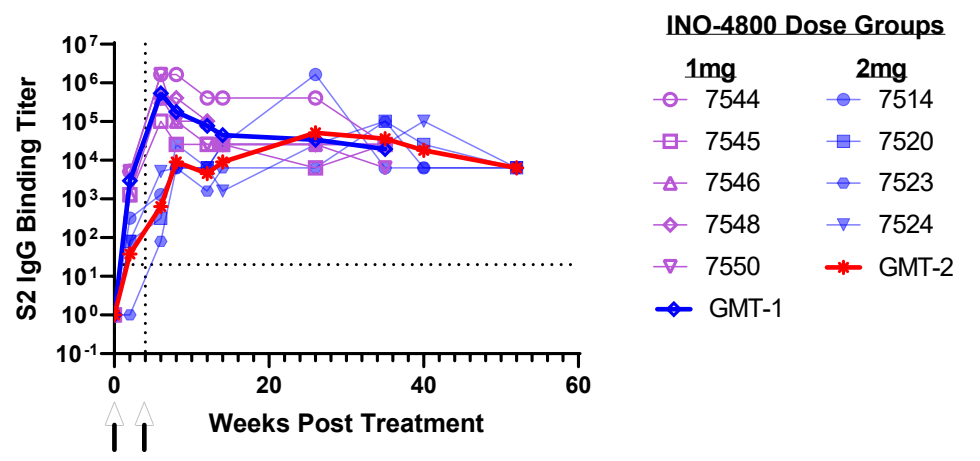

# Supplemental Figure 2

**A**

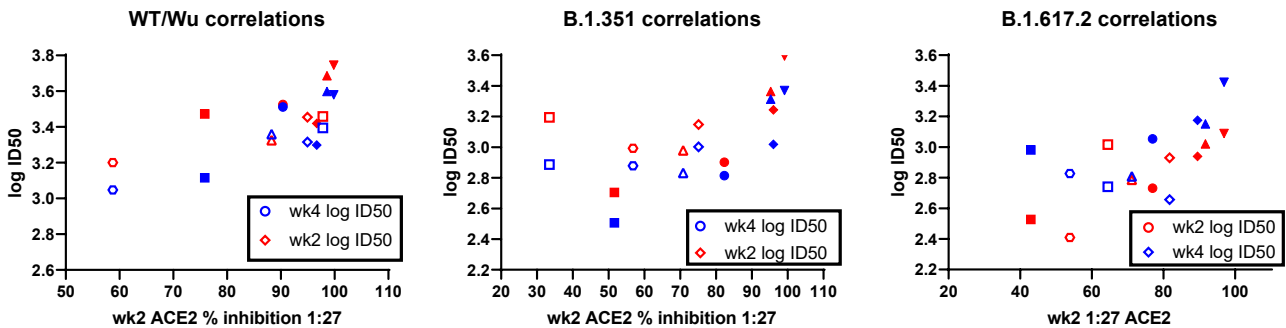

| Spike Variant | Spearman r value (Week 2) | Spearman p value (Week 2) |
|---------------|---------------------------|---------------------------|
| WT            | 0.667                     | 0.059                     |
| B.1.351       | 0.617                     | 0.086                     |
| B.1.617.2     | 0.717                     | 0.037                     |

| Spike Variant | Spearman r value (Week 4) | Spearman p value (Week 4) |
|---------------|---------------------------|---------------------------|
| WT            | 0.783                     | 0.017                     |
| B.1.351       | 0.683                     | 0.050                     |
| B.1.617.2     | 0.833                     | 0.008                     |

**B**

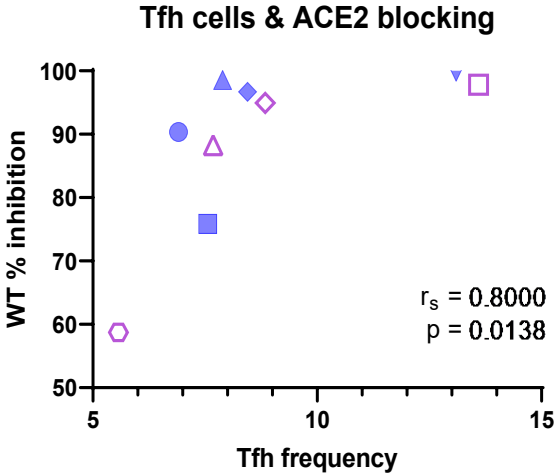

Source: https://www.biorxiv.org/content/10.1101/2021.10.27.466163v1.full.pdf
